# Supplementary material for: Pathogenetic and Therapeutic Applications of Tumor Necrosis Factor-α (TNF-α) in Major Depressive Disorder: A Systematic Review
Source: PubMed Central journal article supplement (PMC4881555; doi:10.3390/ijms17050733), 2016-05-14
Supplement: ijms-17-00733-s001.pdf [file ijms-17-00733-s001.pdf]

# Supplementary Materials: Pathogenetic and Therapeutic Applications of Tumor Necrosis Factor- $\alpha$ (TNF- $\alpha$ ) in Major Depressive Disorder: A Systematic Review

Ke Ma, Hongxiu Zhang and Zulqarnain Baloch

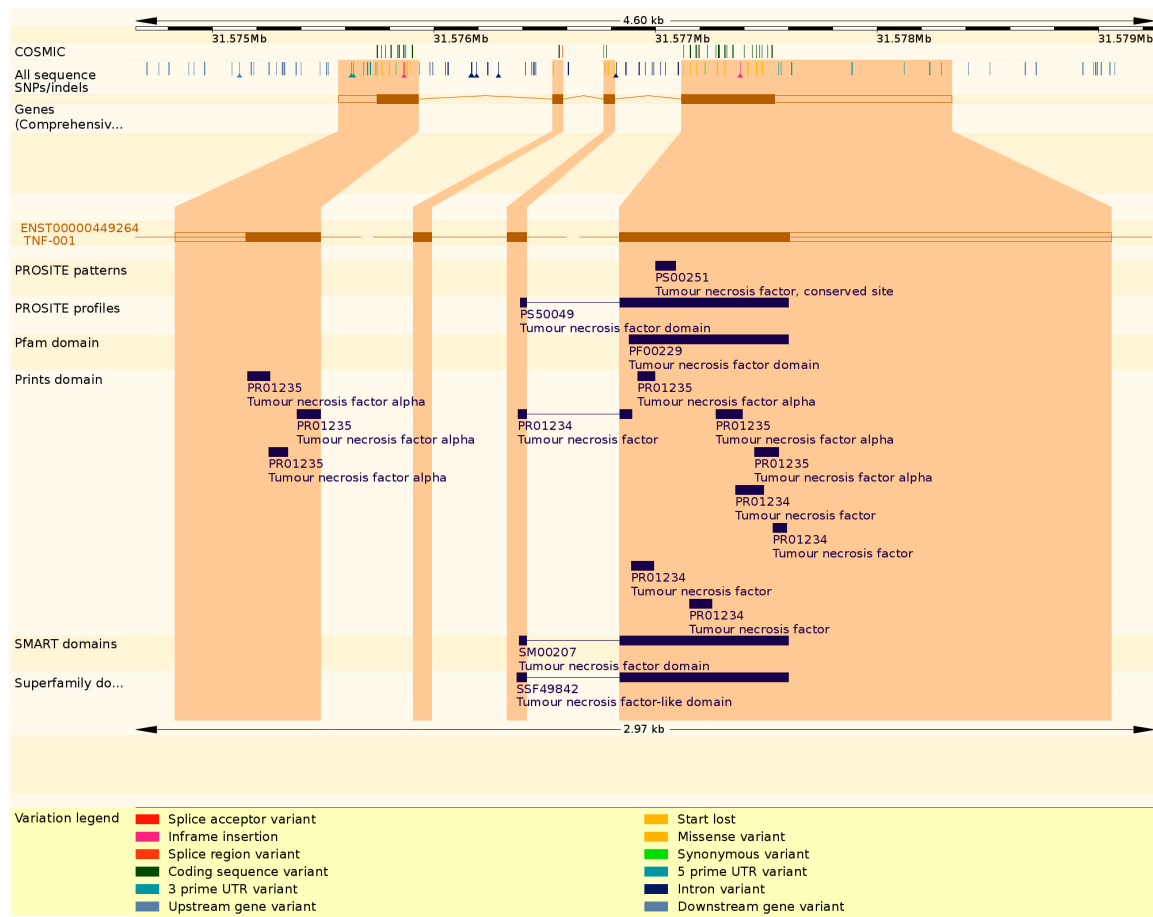

**Figure S1.** The genetic polymorphism of TNF- $\alpha$ . The human *TNF- $\alpha$*  gene is positioned in the class III region of the major histocompatibility complex (MHC), on the small arm of chromosome 6 (6p21.1–21.3). It spans about 3 kilobases and contains 4 exons, encoding a protein consisting of a signal peptide composed of 76 amino acid residues, and the 157 amino acid residues of the mature peptide. Multiple genetic polymorphism loci are present in the *TNF- $\alpha$*  gene region. According to data from national center for biotechnology information (NCBI), more than 391 SNPs have been identified.
